# Supplementary material for: Deciphering cell signaling networks with massively multiplexed biosensor barcoding
Source: PubMed Central journal article supplement — Cell. Author manuscript; Available in PMC 2021 Dec 20. (PMC8686192; doi:10.1016/j.cell.2021.11.005), 2021-11-26
Supplement: NIHMS1756273-supplement-2.pdf [file NIHMS1756273-supplement-2.pdf]

# Figure S2

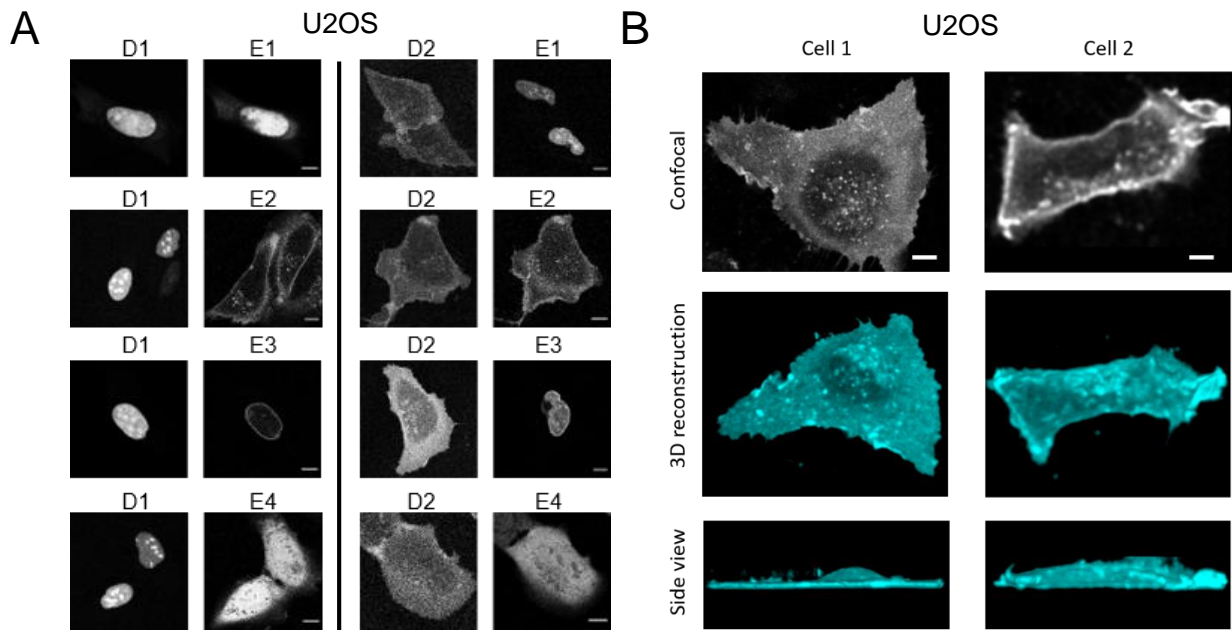

**C**

Original models

|      |            | Prediction |      |      |      |      |      |      |      |   |
|------|------------|------------|------|------|------|------|------|------|------|---|
|      |            | D1E1       | D1E2 | D1E3 | D1E4 | D2E1 | D2E2 | D2E3 | D2E4 |   |
| U2OS | True label | D1E1       | 100  | 0    | 0    | 0    | 0    | 0    | 0    | 0 |
|      | D1E2       | 5          | 20   | 5    | 70   | 0    | 0    | 0    | 0    |   |
|      | D1E3       | 2.9        | 0    | 91.2 | 5.9  | 0    | 0    | 0    | 0    |   |
|      | D1E4       | 1.4        | 0    | 0    | 98.6 | 0    | 0    | 0    | 0    |   |
|      | D2E1       | 0          | 0    | 0    | 0    | 100  | 0    | 0    | 0    |   |
|      | D2E2       | 53.8       | 0    | 0    | 7.7  | 0    | 38.5 | 0    | 0    |   |
|      | D2E3       | 33.3       | 0    | 33.3 | 0    | 33.3 | 0    | 0    | 0    |   |
|      | D2E4       | 18.2       | 0    | 0    | 9.1  | 0    | 0    | 0    | 72.7 |   |

New models

|      |            | Prediction |      |      |      |      |      |      |      |
|------|------------|------------|------|------|------|------|------|------|------|
|      |            | D1E1       | D1E2 | D1E3 | D1E4 | D2E1 | D2E2 | D2E3 | D2E4 |
| U2OS | True label | D1E1       | 100  | 0    | 0    | 0    | 0    | 0    | 0    |
|      | D1E2       | 0          | 100  | 0    | 0    | 0    | 0    | 0    | 0    |
|      | D1E3       | 0          | 0    | 92.7 | 0    | 0    | 7.3  | 0    | 0    |
|      | D1E4       | 0          | 0    | 0    | 100  | 0    | 0    | 0    | 0    |
|      | D2E1       | 0          | 0    | 0    | 0    | 98.3 | 0    | 0    | 1.7  |
|      | D2E2       | 0          | 0    | 0    | 0    | 0    | 100  | 0    | 0    |
|      | D2E3       | 0          | 0    | 3.5  | 0    | 1.8  | 0    | 94.7 | 0    |
|      | D2E4       | 0          | 0    | 0    | 1.7  | 0    | 0    | 0    | 98.3 |
