# Supplementary material for: Deciphering cell signaling networks with massively multiplexed biosensor barcoding
Source: PubMed Central journal article supplement — Cell. Author manuscript; Available in PMC 2021 Dec 20. (PMC8686192; doi:10.1016/j.cell.2021.11.005), 2021-11-26

# Figure S4

A General model: 
$$\hat{y}(t) = \begin{cases} a_1, & x < t_0 \\ a_1 - a_2(1 - e^{-a_3(t-t_0)})e^{-a_4(t-t_0)}, & x \geq t_0 \end{cases}$$

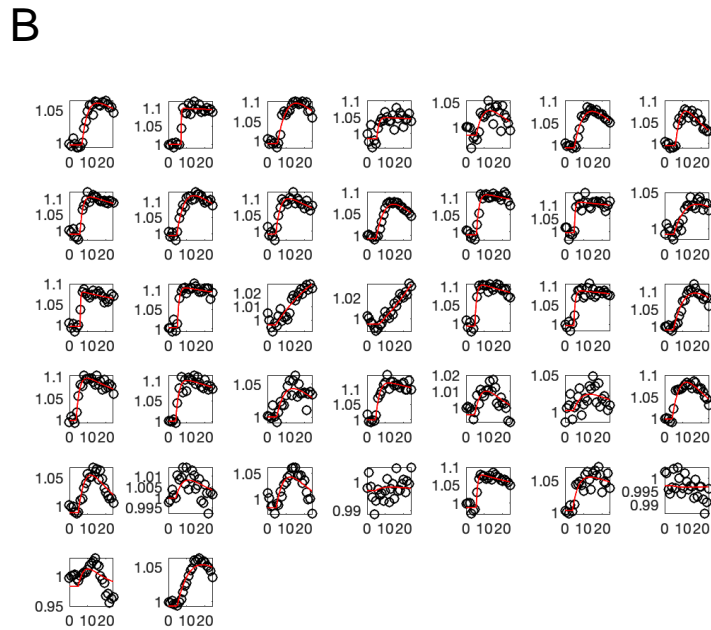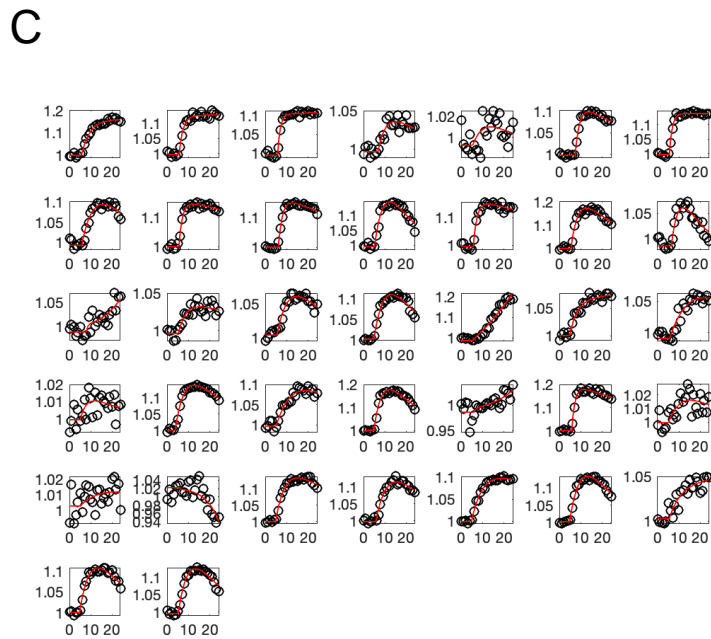

D Coefficients (with 95% confidence bounds):

$$\begin{aligned} a_1 &= 0.9967 \quad (0.992, 1.002) \\ a_2 &= -0.1523 \quad (-0.3327, 0.02815) \\ a_3 &= 0.1554 \quad (-0.07111, 0.382) \\ a_4 &= 0.05544 \quad (0.001077, 0.1098) \\ t_0 &= 4.77 \quad (4.261, 5.279) \end{aligned}$$

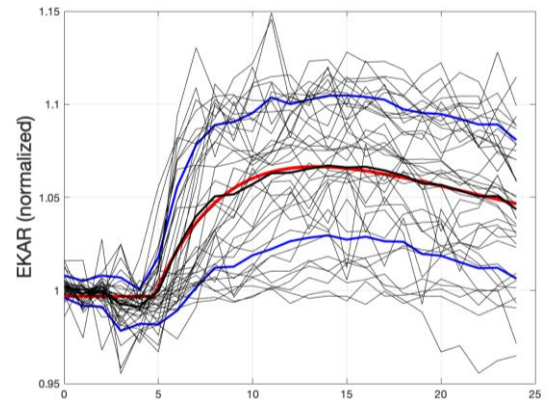

E Coefficients (with 95% confidence bounds):

$$\begin{aligned} a_1 &= 0.9989 \quad (0.993, 1.005) \\ a_2 &= -0.1546 \quad (-0.2898, -0.01943) \\ a_3 &= 0.1988 \quad (-0.0469, 0.4446) \\ a_4 &= 0.03686 \quad (-0.007969, 0.08168) \\ t_0 &= 5.355 \quad (4.656, 6.053) \end{aligned}$$

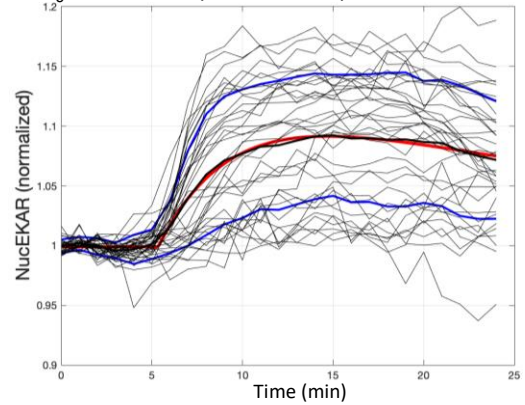

Supplement: NIHMS1756273-supplement-4.pdf [file NIHMS1756273-supplement-4.pdf]
