# Supplementary figures and images for: Deciphering cell signaling networks with massively multiplexed biosensor barcoding
Source: PubMed Central journal article supplement — Cell. Author manuscript; Available in PMC 2021 Dec 20. (PMC8686192; doi:10.1016/j.cell.2021.11.005), 2021-11-26

**Figure S1**

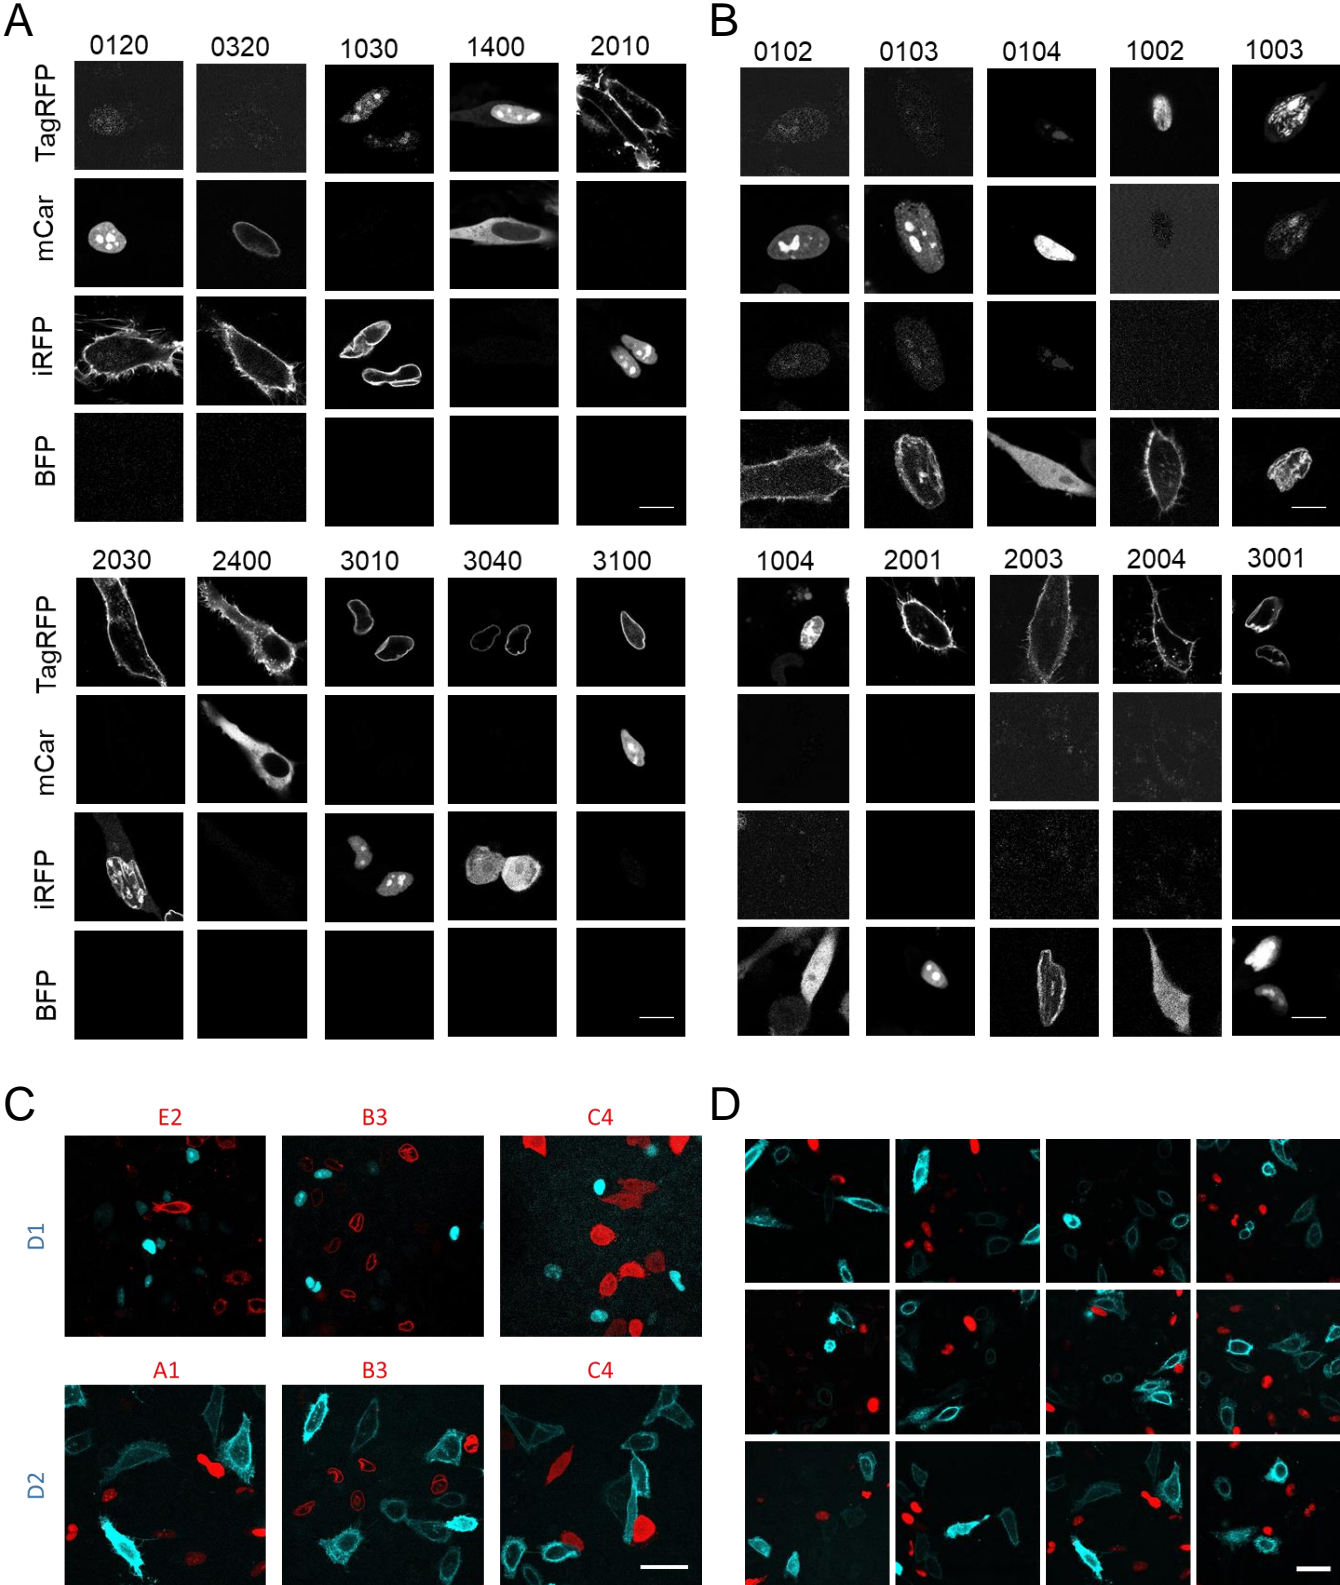

Supplement: NIHMS1756273-supplement-1.pdf [file NIHMS1756273-supplement-1.pdf]

**Figure S6**

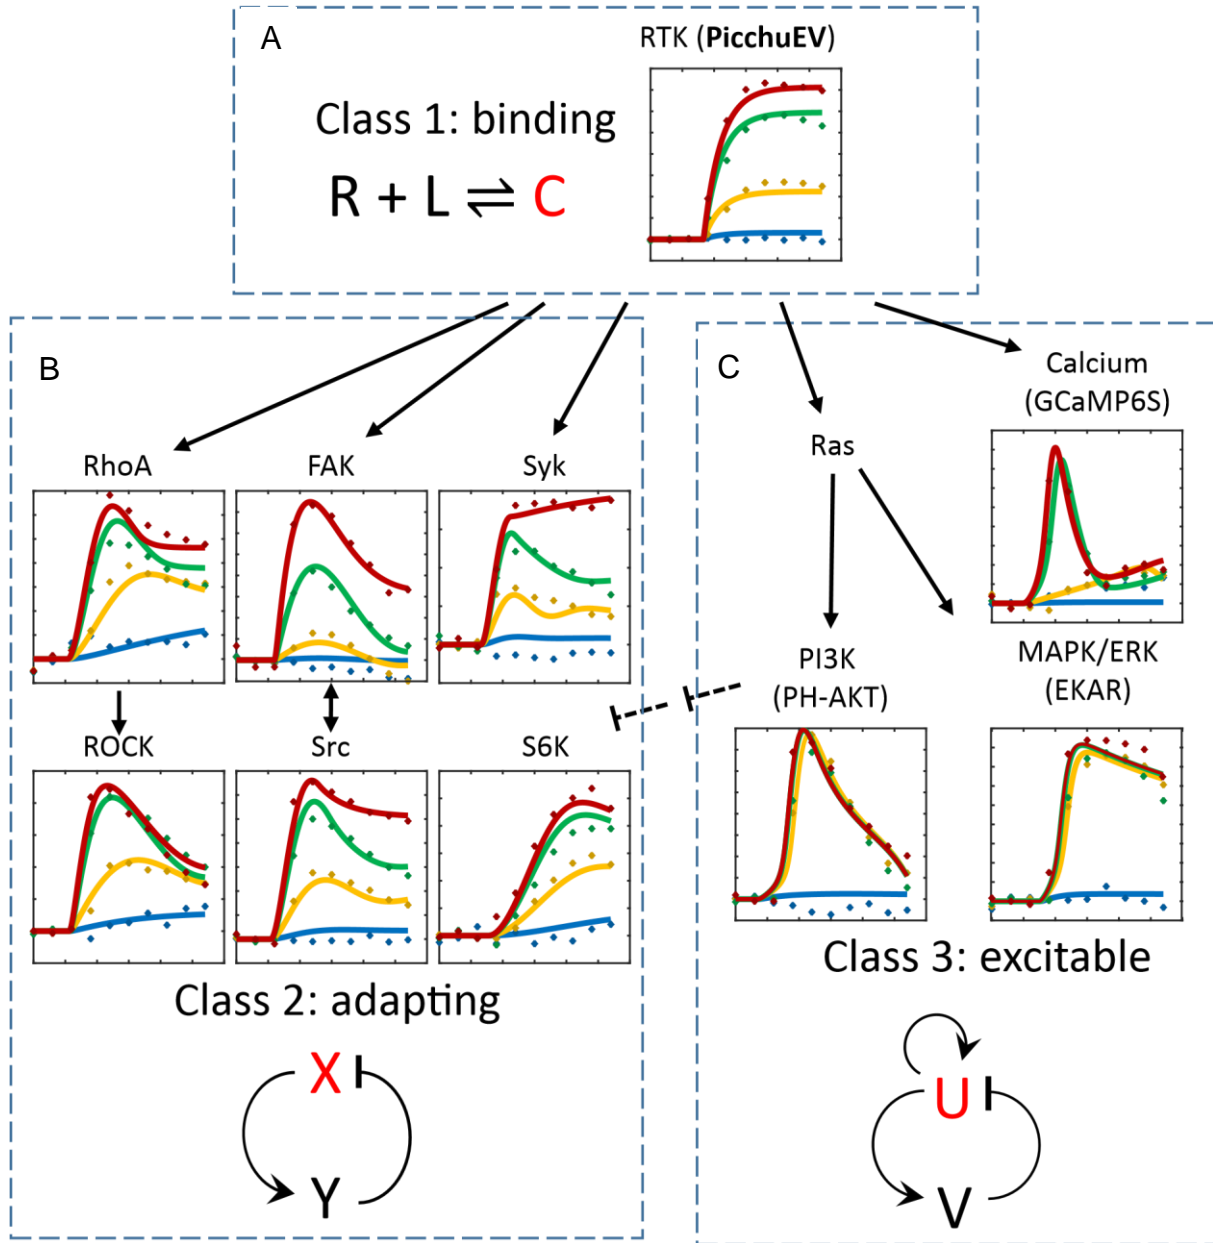

Supplement: NIHMS1756273-supplement-6.pdf [file NIHMS1756273-supplement-6.pdf]
